# Supplementary material
Source: publisher figshare collection journal article supplement (https://acs.figshare.com/ndownloader/files/3824563)
Supplement: Supplementary file 1 [file 3824563]

*Supporting Information*

**Metal-organic framework derived ZnO/ZnFe<sub>2</sub>O<sub>4</sub>/C  
nanocages as stable cathode material for reversible  
lithium-oxygen batteries**

**Wei Yin, Yue Shen\*, Feng Zou, Xianluo Hu, Bo Chi and Yunhui Huang\***

State Key Laboratory of Materials Processing and Die & Mould Technology School of  
Materials Science and Engineering Huazhong University of Science and Technology,

Wuhan 430074 , P.R. China

Fax&Tel: 027-87558241,

Yunhui Huang, E-mail: huangyh@hust.edu.cn

Yue Shen, E-mail: shenyue1213@hust.edu.cn

## **Preparation of $\alpha$ -MnO<sub>2</sub> nanowires**

Nanocrystalline  $\alpha$ -MnO<sub>2</sub> nanowires were synthesized by a modified hydrothermal method as reported elsewhere<sup>1</sup>. 0.1 mol l<sup>-1</sup> MnSO<sub>4</sub>•H<sub>2</sub>O was dissolved in 30 ml water and 0.1 mol l<sup>-1</sup> KMnO<sub>4</sub> was added under stirring at room temperature. The solution was transferred to a Teflon-lined stainless-steel autoclave, sealed and maintained at 140 °C for 12 h. After cooling to room temperature, the resulting mixture was collected by centrifugation, and washed with de-ionized water and ethanol for several times, and then dried at 80 °C for 12 h to obtain the  $\alpha$ -MnO<sub>2</sub> nanowires.

## **Preparation of Co<sub>3</sub>O<sub>4</sub> nanoflakes**

CoOOH with a thickness of 8 nm was synthesized by using an air oxidation method<sup>2</sup>. 100 ml dilute aqueous solution of Co(NO<sub>3</sub>)<sub>2</sub>•6H<sub>2</sub>O (0.02 mol) was slowly added to 100 ml 5 mol l<sup>-1</sup> NaOH aqueous solution. The resulting pink Co(OH)<sub>2</sub> suspension was poured into 1800 ml water, and then the mixture was stirred in air overnight, affording a brown CoOOH precipitate. The precipitate was centrifuged and washed with water twice, and then dried at 80 °C in vacuum for 12 h to give nanoplatelet CoOOH. Then the as-prepared CoOOH was sintered at 400 °C for 3 h in air atmosphere to obtain the Co<sub>3</sub>O<sub>4</sub> nanoflakes.

## **Preparation of Fe<sub>2</sub>O<sub>3</sub> nanoflakes**

Fe<sub>2</sub>O<sub>3</sub> nanoflakes were synthesized via a hydrothermal method as reported elsewhere<sup>3</sup>. In a typical synthesis procedure, 0.2 g FeCl<sub>3</sub>•6H<sub>2</sub>O was dissolved in 40 ml

mixed solvent containing glycerol (6 ml) and de-ionized water (34 ml). The mixture was stirred for 30 min and then transferred into a 60 ml Teflon-lined stainless steel autoclave, heated to 160 °C in an oven for 10 h. After cooling to room temperature, the red product was collected by centrifugation, and washed with de-ionized water and ethanol for several times, and then dried at 80 °C for 12 h to get the Fe<sub>2</sub>O<sub>3</sub> nanoflakes.

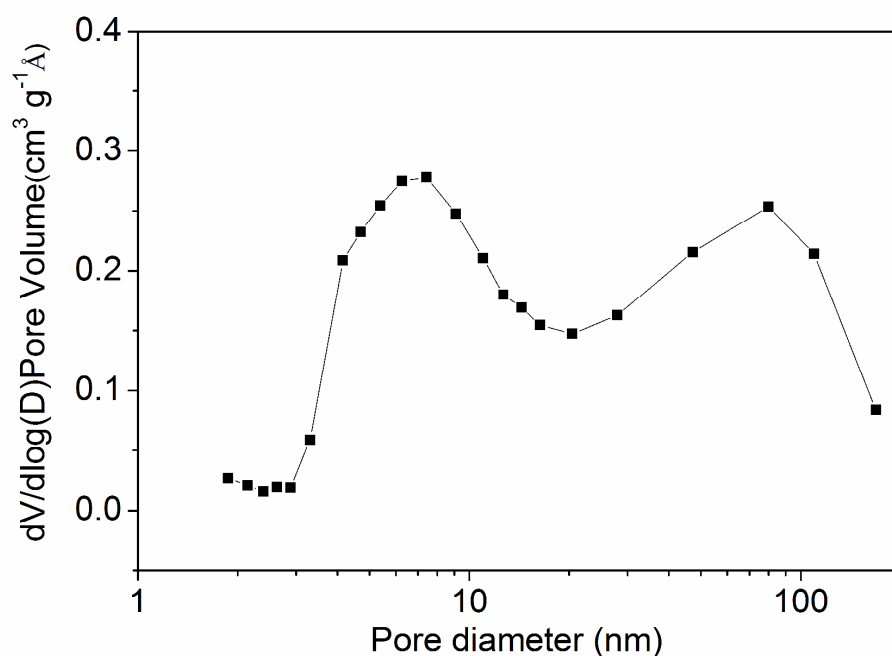

**Figure S1.** Pore-size distribution of the as-prepared ZZFC obtained in N<sub>2</sub> atmosphere at 500 °C.

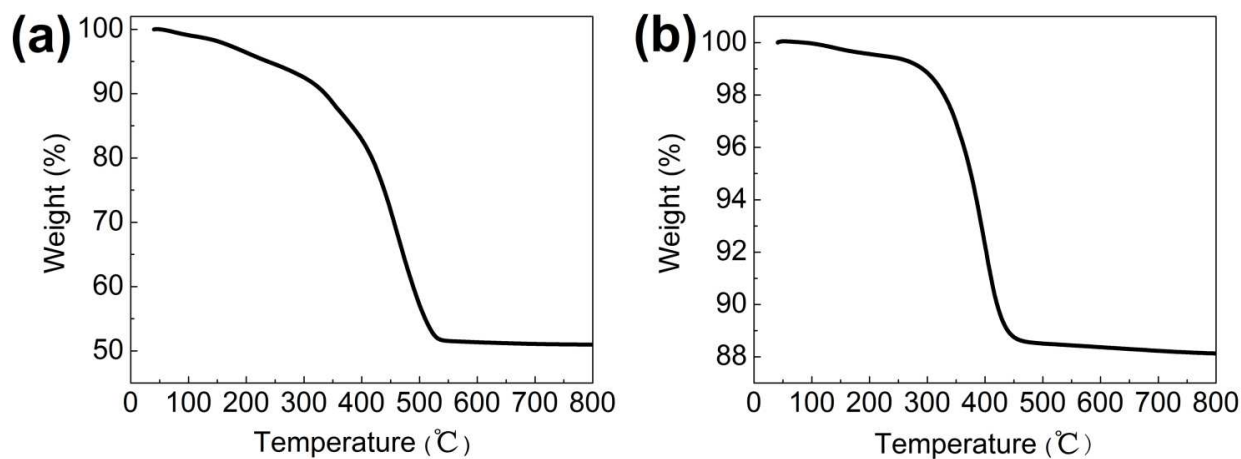

**Figure S2.** Thermogravimetric (TG) curves at a heating rate of 10 °C min<sup>-1</sup> for (a) Fe(III)-modified MOF-5 obtained in the nitrogen flow, and (b) ZZFC obtained in air flow.

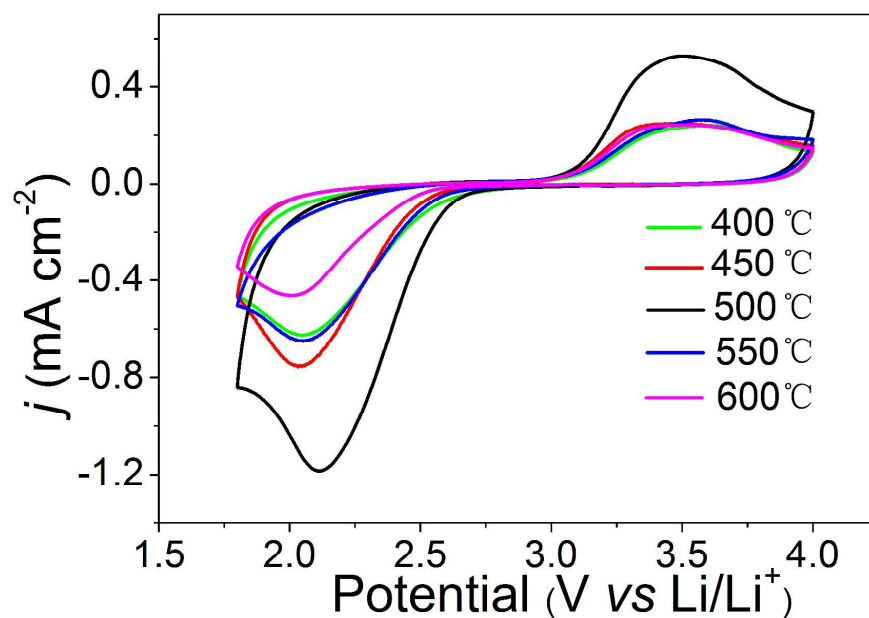

**Figure S3.** CVs of the samples after sintering Fe(III)-MOF-5 in N<sub>2</sub> at various temperatures: 400 °C (green line), 450 °C (red line), 500 °C (black line), 550 °C (blue line), 600 °C (magenta line). CVs were obtained on 80% as-prepared sample+10% super P+10% PVDF electrode in electrolyte of 1.0 M LiTFSI in TEGDME at O<sub>2</sub>-saturated atmosphere. The scan rate was set at 0.1 V s<sup>-1</sup>.

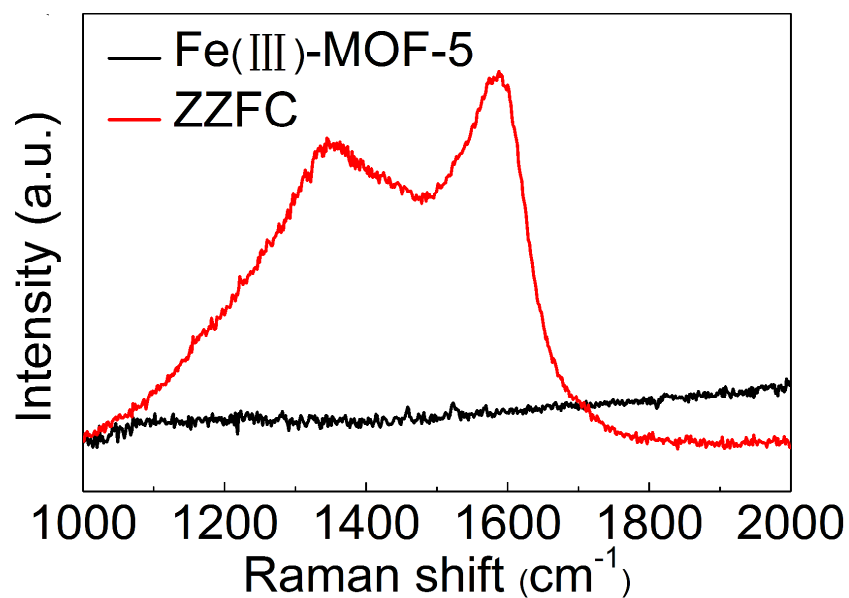

**Figure S4.** Raman spectrum of Fe(III)-MOF-5 and ZZFC.

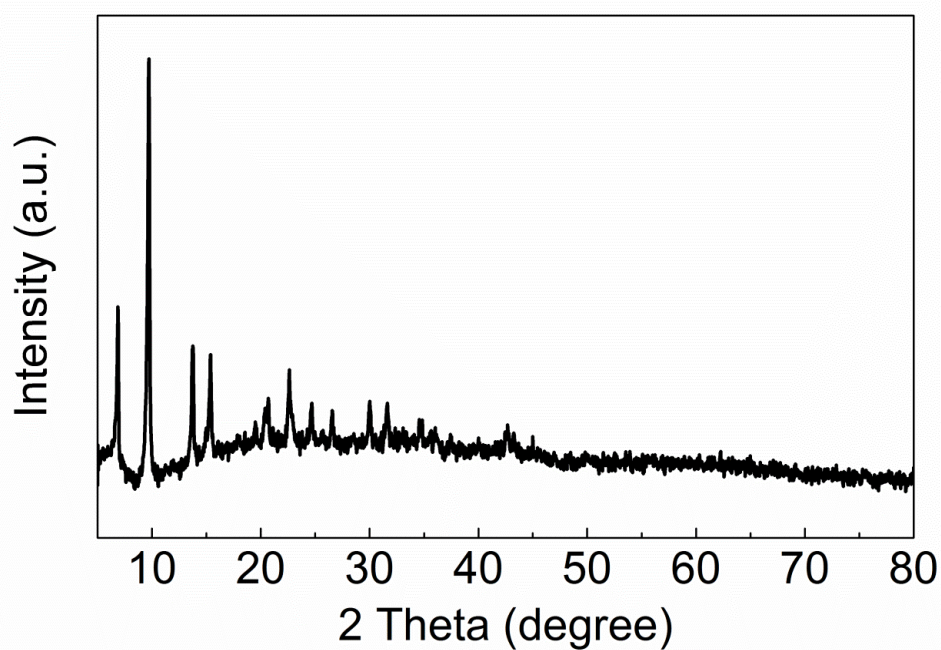

**Figure S5.** XRD patterns of the Fe(III)- MOF-5.

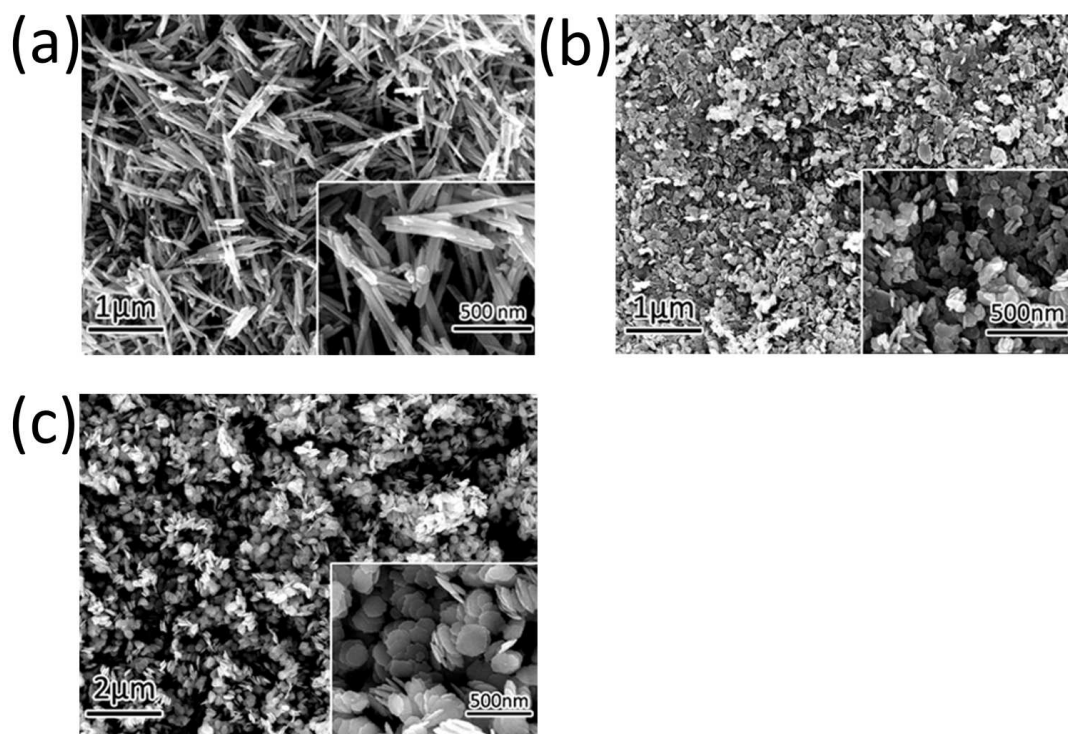

**Figure S6.** SEM images of (a)  $\alpha$ -MnO<sub>2</sub> nanowires, (b) Co<sub>3</sub>O<sub>4</sub> nanoflakes, (c) Fe<sub>2</sub>O<sub>3</sub> nanoflakes.

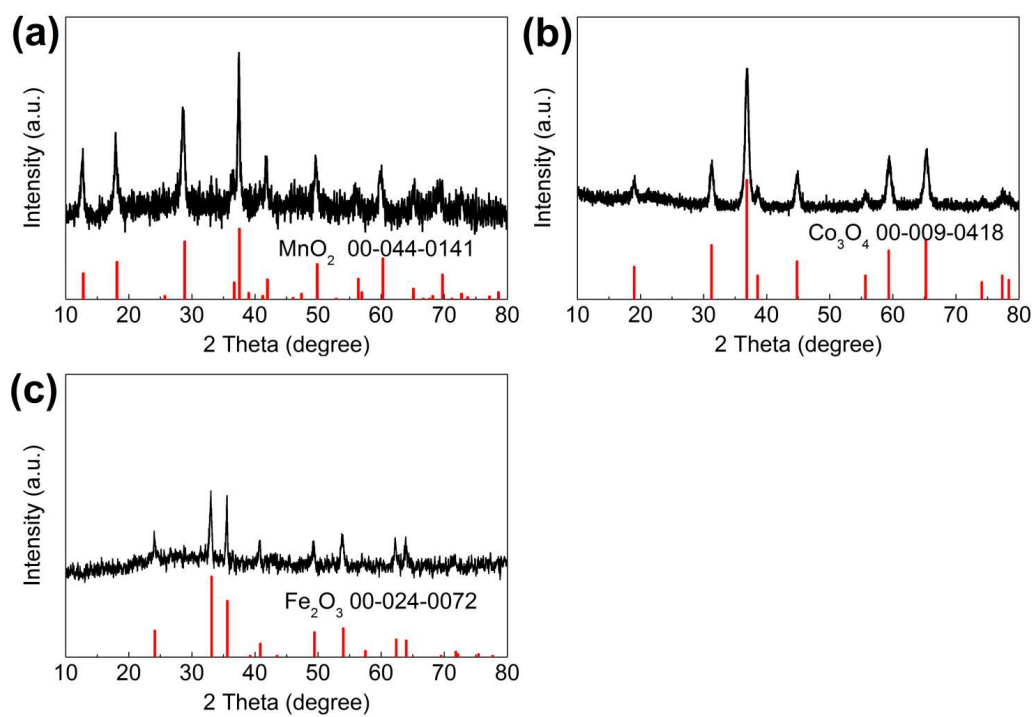

**Figure S7.** XRD patterns of (a)  $\alpha\text{-MnO}_2$  nanowires, (b)  $\text{Co}_3\text{O}_4$  nanoflakes, (c)  $\text{Fe}_2\text{O}_3$  nanoflakes.



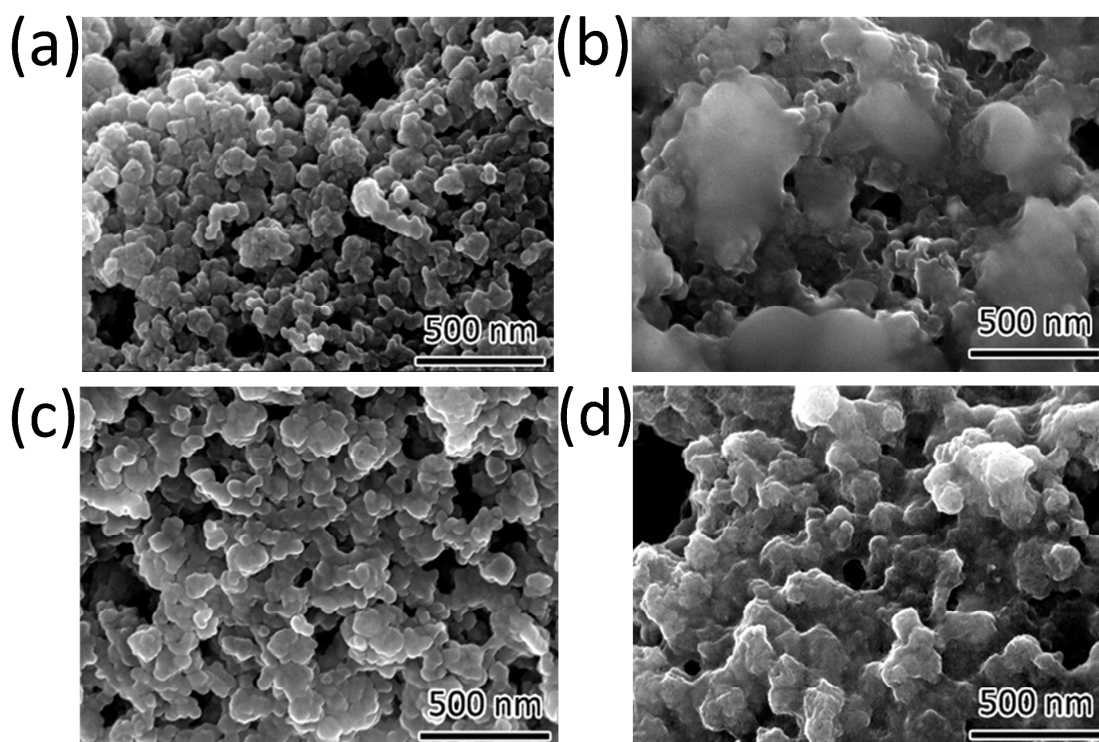

**Figure S8.** SEM images for the as-prepared ZZFC cathodes: (a) before cycling, (b) full discharge, (c) after charge, and (d) after 10 cycles.

## References

- (1) Song, K.; Jung, J.; Heo, Y. U.; Lee, Y. C.; Cho, K.; Kang, Y. M. Alpha-MnO<sub>2</sub> Nanowire Catalysts with Ultra-High Capacity and Extremely Low Overpotential in Lithium-Air Batteries Through Tailored Surface Arrangement. *Phys. Chem. Chem. Phys.* **2013**, *15*, 20075-20079.
- (2) Okubo, M.; Hosono, E.; Kim, J.; Enomoto, M.; Kojima, N.; Kudo, T.; Zhou, H.; Honma, I. Nanosize Effect on High-Rate Li-Ion Intercalation in LiCoO<sub>2</sub> Electrode. *J. Am. Chem. Soc.* **2007**, *129*, 7444-7452.
- (3) Zhang, Z.; Zhou, G.; Chen, W.; Lai, Y.; Li, J. Facile Synthesis of Fe<sub>2</sub>O<sub>3</sub> Nanoflakes and Their Electrochemical Properties for Li-Air Batteries. *ECS Electrochem. Lett.* **2013**, *3*, A8-A10.
